# Supplementary material for: Feedforward growth rate control mitigates gene activation burden
Source: PubMed Central journal article supplement (PMC9672102; doi:10.1038/s41467-022-34647-1), 2022-11-17
Supplement: 41467_2022_34647_MOESM4_ESM.pdf [file 41467_2022_34647_MOESM4_ESM.pdf]

Title: Supplementary Software

Description: The zip file including codes to produce simulation results in Figures 2 and 3.
